# Supplementary material
Source: ML conference proceedings conference paper supplement (https://openaccess.thecvf.com/content/cvpr_2015/html/Dixit_Scene_Classification_With_2015_CVPR_paper.html)
Supplement: Supplementary file 1 [file Dixit_Scene_Classification_With_2015_CVPR_supplemental.pdf]

# Supplement: Scene Classification with Semantic Fisher Vectors

## 1. Direct Implementation of a Semantic Fisher Vector

We follow the derivations in Appendix A of [2] to compute the Fisher information matrix for a Dirichlet Mixture distribution. For a  $K$  mixture model with mixture weights  $w_s$  and component parameters  $\alpha_s$ , the following was shown to be a reasonable assumption.

$$\frac{\partial p(k|x)}{\partial \alpha_s} = p(k|x) [\delta(s, k) - p(k|x)] \frac{\partial \log p(x|s)}{\partial \alpha_s} \approx 0 \quad (1)$$

where  $\delta(s, k)$  is an indicator function, that equals 1 if  $s = k$ , and is 0 otherwise. This assumption is valid for large mixture distributions, where the posterior probabilities  $P(k|x)$  are very peaky, and therefore  $P(k|x)P(s|x) \approx 0$  if  $k \neq s$  and  $P(k|x) \approx P(k|x)P(s|x)$  if  $k = s$ .

Second order derivative of a Dirichlet mixture log likelihood with respect to its parameters can be expressed as,

$$\begin{aligned} \frac{\partial^2 \mathcal{L}}{\partial \alpha_{sm} \partial \alpha_{kl}} &= \frac{\partial}{\partial \alpha_{sm}} p(k|\pi) \left( \psi\left(\sum_l \alpha_{kl}\right) - \psi(\alpha_{kl}) + \log \pi_l \right) \\ &= \left( \frac{\partial p(k|\pi)}{\partial \alpha_{sm}} \right) \left( \psi\left(\sum_l \alpha_{kl}\right) - \psi(\alpha_{kl}) \right) \\ &\quad + p(k|\pi) \left( \frac{\partial}{\partial \alpha_{sm}} \psi\left(\sum_l \alpha_{kl}\right) - \frac{\partial}{\partial \alpha_{sm}} \psi(\alpha_{kl}) \right) \quad (2) \\ &= 0 + p(k|\pi) \left( \psi'\left(\sum_l \alpha_{kl}\right) - \psi'(\alpha_{kl}) \delta(l, m) \right) \delta(k, s) \end{aligned}$$

where  $\pi_l$  is the  $l^{th}$  dimension of the data point  $\pi$ , which is a probability vector, and  $\psi'(x) = \frac{\partial \psi(x)}{\partial x}$  is a digamma function. The presence of  $\delta(k, s)$  in the expression indicates that  $\frac{\partial^2 \mathcal{L}}{\partial \alpha_{sm} \partial \alpha_{kl}} = 0$  if  $k \neq s$ , that is, if the gradient is with respect to parameters of two different mixture components. The Fisher Information matrix, therefore simplifies into the

following block diagonal form.

$$\begin{aligned} \mathcal{F}_{lm} &= E \left[ -\frac{\partial^2 \log P(\pi | \{\alpha_k, w_k\}_{k=1}^K)}{\partial \alpha_{kl} \partial \alpha_{km}} \right] \\ &= E [p(k|\pi)] \left( \psi'(\alpha_{kl}) \delta(l, m) - \psi'\left(\sum_l \alpha_{kl}\right) \right) \quad (3) \\ &= w_k \left( \psi'(\alpha_{kl}) \delta(l, m) - \psi'\left(\sum_l \alpha_{kl}\right) \right) \end{aligned}$$

The matrix  $\mathcal{F}^{-1/2}$  is used to scale the DMM based Fisher scores of each image BoS (see eq (8) in the paper). The resulting image representation is referred to as a Dirichlet mixture Fisher vector (DMM FV). Note that we do not use Fisher gradients of mixture weights in our image representation, as they often result in negligible performance gains [1].

## References

- [1] F. Perronnin, J. Sánchez, and T. Mensink. Improving the fisher kernel for large-scale image classification. In *Proceedings of the 11th European conference on Computer vision: Part IV, ECCV'10*, pages 143–156, Berlin, Heidelberg, 2010. Springer-Verlag. 1
- [2] J. Sánchez, F. Perronnin, T. Mensink, and J. J. Verbeek. Image classification with the fisher vector: Theory and practice. *International Journal of Computer Vision*, 105(3):222–245, 2013. 1
